# Supplementary material for: Subcortical Functional Connectivity Gradients in Temporal Lobe Epilepsy
Source: PubMed Central journal article supplement — medRxiv. 2023 Jan 9:2023.01.08.23284313. Preprint. [Version 1] doi: 10.1101/2023.01.08.23284313 (PMC9882434; doi:10.1101/2023.01.08.23284313), 2023-01-09
Supplement: media-1.pdf [file media-1.pdf]

# **A Description of Subcortical Functional Connectivity Gradients in Temporal Lobe Epilepsy**

Supplementary Figures and Tables

**Supplementary Table 1** – Regression coefficients and corresponding p-values for linear model of disease factors predicting the z-scored mean of gradient 1 at each subcortical ROI

| I-Hippocampus |                |         |              |          | C-Hippocampus |            |        |         |          |
|---------------|----------------|---------|--------------|----------|---------------|------------|--------|---------|----------|
|               | Laterality     | MTS     | BTCS         | Duration |               | Laterality | MTS    | BTCS    | Duration |
| $\beta$       | <b>-0.0197</b> | -0.0032 | -0.0035      | -0.0003  | $\beta$       | -0.0082    | 0.0004 | 0.0014  | -0.0002  |
| p-value       | <b>0.004</b>   | 0.665   | 0.631        | 0.332    | p-value       | 0.151      | 0.955  | 0.828   | 0.323    |
| I-Amygdala    |                |         |              |          | C-Amygdala    |            |        |         |          |
|               | Laterality     | MTS     | BTCS         | Duration |               | Laterality | MTS    | BTCS    | Duration |
| $\beta$       | -0.0133        | 0.0027  | -0.0002      | 0.0002   | $\beta$       | -0.0036    | 0.0107 | 0.002   | 0.0002   |
| p-value       | 0.164          | 0.799   | 0.983        | 0.655    | p-value       | 0.637      | 0.206  | 0.811   | 0.554    |
| I-Thalamus    |                |         |              |          | C-Thalamus    |            |        |         |          |
|               | Laterality     | MTS     | BTCS         | Duration |               | Laterality | MTS    | BTCS    | Duration |
| $\beta$       | -0.0041        | -0.0025 | -0.0122      | -0.0005  | $\beta$       | 0.0041     | 0.0004 | -0.0078 | -0.0003  |
| p-value       | 0.58           | 0.757   | 0.135        | 0.121    | p-value       | 0.626      | 0.968  | 0.392   | 0.39     |
| I-Caudate     |                |         |              |          | C-Caudate     |            |        |         |          |
|               | Laterality     | MTS     | BTCS         | Duration |               | Laterality | MTS    | BTCS    | Duration |
| $\beta$       | 0.0096         | -0.0034 | <b>0.029</b> | 0.0006   | $\beta$       | 0.0046     | 0.0005 | 0.0159  | 0.0008   |
| p-value       | 0.351          | 0.765   | <b>0.012</b> | 0.13     | p-value       | 0.652      | 0.962  | 0.161   | 0.071    |
| I-Putamen     |                |         |              |          | C-Putamen     |            |        |         |          |
|               | Laterality     | MTS     | BTCS         | Duration |               | Laterality | MTS    | BTCS    | Duration |
| $\beta$       | 0.0122         | -0.0003 | 0.0058       | 0.0004   | $\beta$       | 0.0067     | 0.0003 | 0.0005  | 0.0002   |
| p-value       | 0.047          | 0.96    | 0.377        | 0.119    | p-value       | 0.371      | 0.972  | 0.953   | 0.567    |
| I-Pallidum    |                |         |              |          | C-Pallidum    |            |        |         |          |
|               | Laterality     | MTS     | BTCS         | Duration |               | Laterality | MTS    | BTCS    | Duration |
| $\beta$       | 0.002          | 0.0076  | -0.0083      | -0.0002  | $\beta$       | -0.0063    | 0.0021 | -0.0089 | -0.0001  |
| p-value       | 0.674          | 0.152   | 0.113        | 0.39     | p-value       | 0.423      | 0.81   | 0.299   | 0.697    |

**Supplementary Table 2** – Regression coefficients and corresponding p-values for linear models of disease factors predicting the z-scored variance of gradient 1 at each subcortical ROI

| I-Hippocampus |                |         |          |           | C-Hippocampus |            |         |         |           |
|---------------|----------------|---------|----------|-----------|---------------|------------|---------|---------|-----------|
|               | Laterality     | MTS     | BTCS     | Duration  |               | Laterality | MTS     | BTCS    | Duration  |
| $\beta$       | <b>-0.0034</b> | -0.0027 | -0.0005  | -4.04E-05 | $\beta$       | -0.0027    | -0.0024 | 0.0004  | -7.75E-05 |
| p-value       | <b>0.01</b>    | 0.058   | 0.705    | 0.435     | p-value       | 0.041      | 0.108   | 0.789   | 0.146     |
| I-Amygdala    |                |         |          |           | C-Amygdala    |            |         |         |           |
|               | Laterality     | MTS     | BTCS     | Duration  |               | Laterality | MTS     | BTCS    | Duration  |
| $\beta$       | -0.0033        | -0.0026 | -0.0024  | -0.0001   | $\beta$       | -0.0025    | -0.0019 | -0.0005 | -8.04E-05 |
| p-value       | 0.034          | 0.132   | 0.152    | 0.087     | p-value       | 0.063      | 0.211   | 0.757   | 0.137     |
| I-Thalamus    |                |         |          |           | C-Thalamus    |            |         |         |           |
|               | Laterality     | MTS     | BTCS     | Duration  |               | Laterality | MTS     | BTCS    | Duration  |
| $\beta$       | -0.0032        | -0.0028 | 0.0013   | -7.32E-05 | $\beta$       | -0.0024    | -0.0028 | 0.0011  | -8.64E-05 |
| p-value       | 0.029          | 0.088   | 0.431    | 0.213     | p-value       | 0.151      | 0.126   | 0.554   | 0.199     |
| I-Caudate     |                |         |          |           | C-Caudate     |            |         |         |           |
|               | Laterality     | MTS     | BTCS     | Duration  |               | Laterality | MTS     | BTCS    | Duration  |
| $\beta$       | -0.001         | -0.0013 | 6.35E-05 | -2.33E-05 | $\beta$       | -0.0015    | -0.0014 | 0.0006  | -2.59E-05 |
| p-value       | 0.397          | 0.333   | 0.961    | 0.627     | p-value       | 0.189      | 0.255   | 0.63    | 0.571     |
| I-Putamen     |                |         |          |           | C-Putamen     |            |         |         |           |
|               | Laterality     | MTS     | BTCS     | Duration  |               | Laterality | MTS     | BTCS    | Duration  |
| $\beta$       | -0.002         | -0.0014 | 0.0005   | -2.81E-05 | $\beta$       | -0.0018    | -0.0015 | 0.0001  | -7.69E-05 |
| p-value       | 0.161          | 0.379   | 0.738    | 0.623     | p-value       | 0.175      | 0.316   | 0.929   | 0.161     |
| I-Pallidum    |                |         |          |           | C-Pallidum    |            |         |         |           |
|               | Laterality     | MTS     | BTCS     | Duration  |               | Laterality | MTS     | BTCS    | Duration  |
| $\beta$       | -0.002         | -0.0019 | -0.0003  | -3.23E-05 | $\beta$       | -0.0032    | -0.0031 | 0.0015  | -8.03E-05 |
| p-value       | 0.055          | 0.093   | 0.783    | 0.428     | p-value       | 0.033      | 0.061   | 0.347   | 0.184     |

**Supplementary Table 3** - Regression coefficients and corresponding p-values for linear models of disease factors predicting the global variance of gradient 1 across all subcortical ROIs

|                           | <b>Global Variance</b> |            |             |                 |
|---------------------------|------------------------|------------|-------------|-----------------|
|                           | <b>Laterality</b>      | <b>MTS</b> | <b>BTCS</b> | <b>Duration</b> |
| <b><math>\beta</math></b> | -0.8413                | -0.9904    | 0.3233      | -0.0155         |
| <b>p-value</b>            | 0.086                  | 0.069      | 0.542       | 0.427           |

**Supplementary Table 4** - Bhattacharyya Distance and corresponding p-value between the 2D distribution generated by gradient 1 and gradient 2 in L-TLE and R-TLE subjects in the ipsilateral hippocampus, computed using different similarity metrics and dimensionality reduction approaches for gradient estimation. DM: Diffusion mapping. LE: Laplacian embedding. PCA: principal component analysis.

| <b>Method</b>          | <b>Bhattacharyya Distance</b> | <b>p-value</b>     |
|------------------------|-------------------------------|--------------------|
| <b>Cosine-DM</b>       | <b>0.107963972</b>            | <b>0.010989011</b> |
| <b>Gaussian-DM</b>     | <b>0.095780277</b>            | <b>0.020979021</b> |
| <b>Norm. Angle-DM</b>  | <b>0.106681173</b>            | <b>0.01998002</b>  |
| <b>Pearson-DM</b>      | <b>0.097407341</b>            | <b>0.018981019</b> |
| <b>Spearman-DM</b>     | <b>0.065434815</b>            | <b>0.03996004</b>  |
| Cosine-LE              | 0.02770632                    | 0.087912088        |
| <b>Gaussian-LE</b>     | <b>0.034955792</b>            | <b>0.042957043</b> |
| <b>Norm. Angle-LE</b>  | <b>0.044388407</b>            | <b>0.047952048</b> |
| Pearson-LE             | 0.025584961                   | 0.116883117        |
| Spearman-LE            | 0.022037481                   | 0.084915085        |
| <b>Cosine-PCA</b>      | <b>0.1069308</b>              | <b>0.022977023</b> |
| Gaussian-PCA           | 0.059444441                   | 0.06993007         |
| <b>Norm. Angle-PCA</b> | <b>0.111091021</b>            | <b>0.016983017</b> |
| <b>Pearson-PCA</b>     | <b>0.10620882</b>             | <b>0.016983017</b> |
| Spearman-PCA           | 0.031851973                   | 0.228771229        |



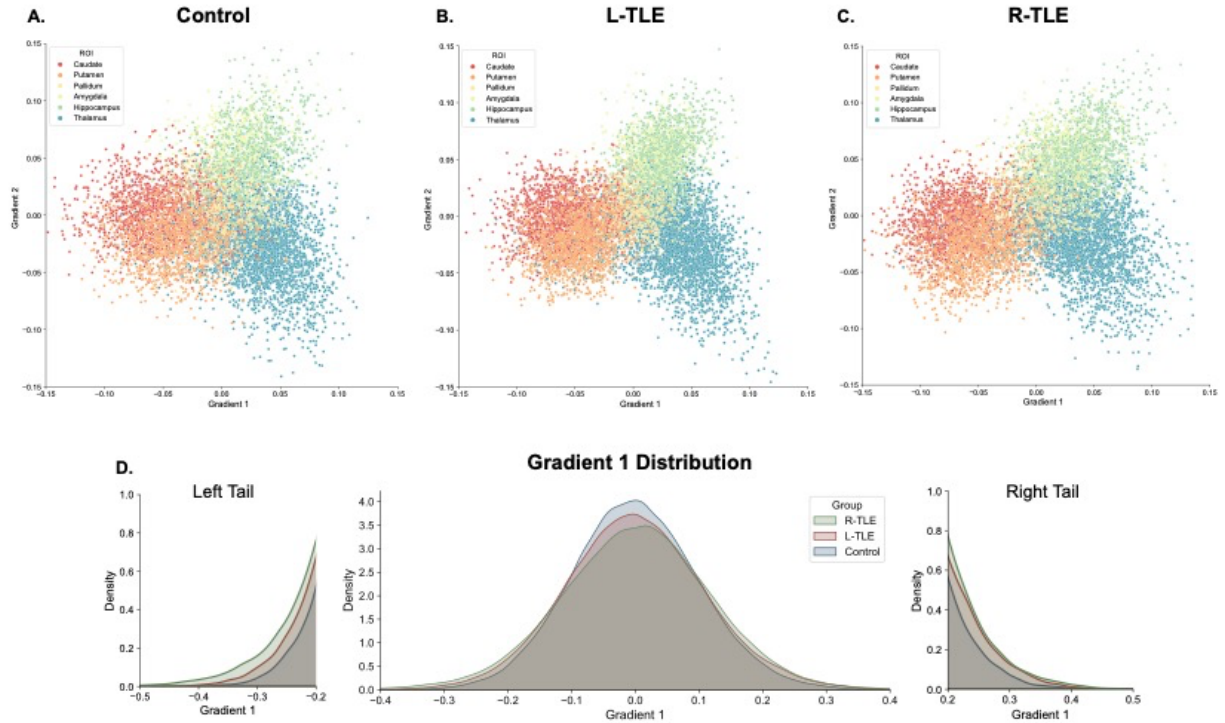

**Supplementary Figure 2 - Overview of the Subcortical Functional Gradient Across ROIs in Healthy Controls, L-TLE and R-TLE:** **A-C.** Average gradient space generated by principal gradient 1 and 2 across all **A.** control subjects, **B.** L-TLE subjects and **C.** R-TLE subjects. Ipsilateral and contralateral structures are assigned the same color in this representation. **D.** Distribution of Gradient 1 across all subjects and ROIs for each subgroup. The left and right tail show an expansion of gradient 1 for left and right TLE relative to controls.

Gradient 1 Values Across Contralateral ROIs

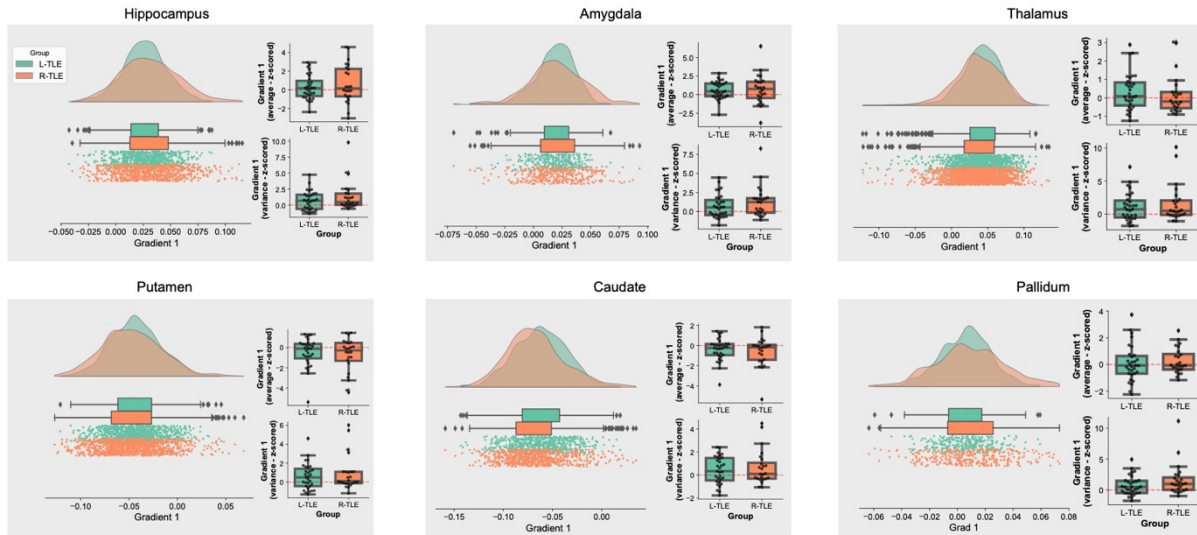

**Supplementary Figure 3 - Principal Gradient 1 Across Contralateral Subcortical ROIs: A-F.** Each panel represents a different subcortical ROI, and they show both, the average distribution in gradient space for gradient 1 across subjects in each group (left), and the distribution of individual gradient 1 mean and variance for subjects in each group (right). The individual subject mean and variance were z-scored relative to the distribution of gradient 1 mean and variance for controls in the same ROI, but across bilateral regions.



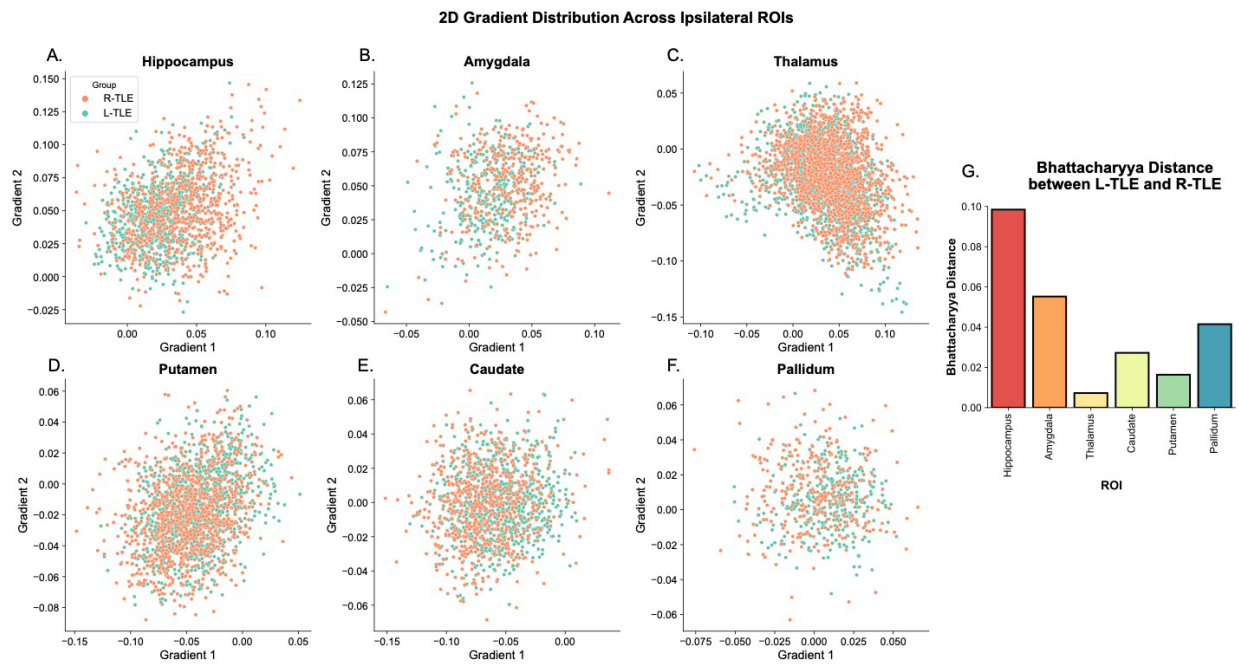

**Supplementary Figure 4 – 2-Dimensional Gradient Distribution Across Ipsilateral ROIs: A-F.** Group average 2-dimensional distribution generated by subcortical functional gradient 1 and 2 of R-TLE and L-TLE across ipsilateral ROIs. **G.** Bhattacharyya distance between the distribution of L-TLE and R-TLE across ROIs.

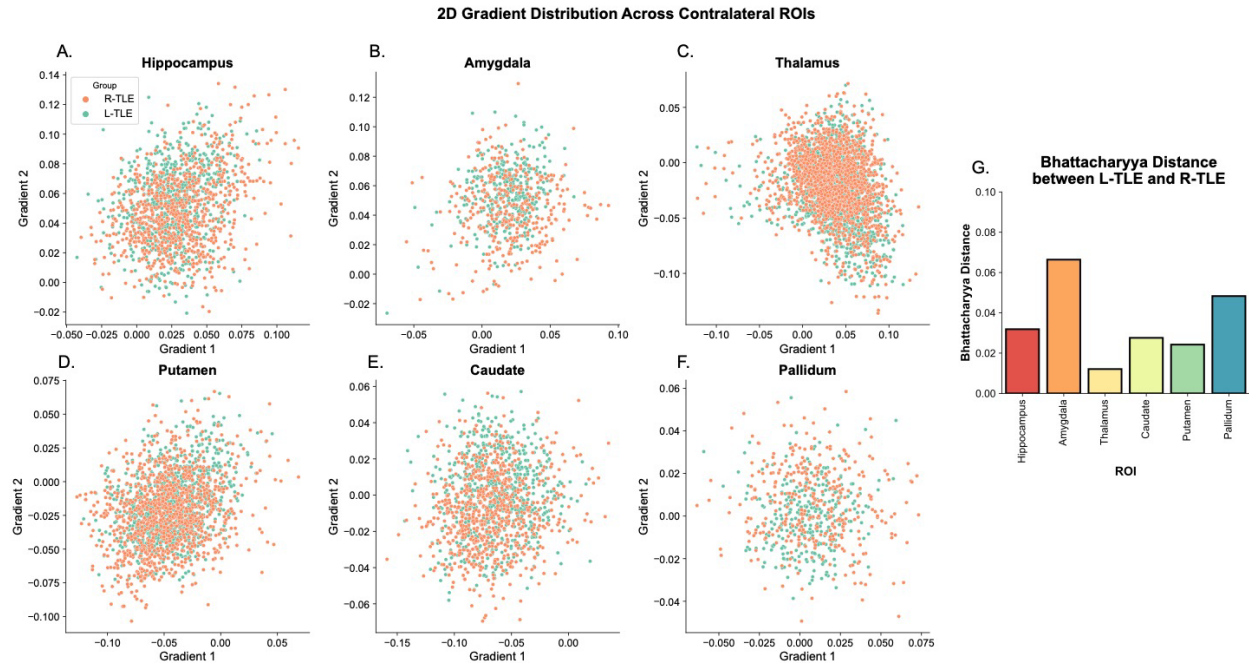

**Supplementary Figure 5 – 2-Dimensional Gradient Distribution Across Contralateral ROIs: A-F.** Group average 2-dimensional distribution generated by subcortical functional gradient 1 and 2 of R-TLE and L-TLE across contralateral ROIs. **G.** Bhattacharyya distance between the distribution of L-TLE and R-TLE across ROIs.
